# Supplementary material
Source: PubMed Central journal article supplement (PMC5076522)
Supplement: 10.1074_M116.736173_jbc.M116.736173-1.pdf [file 10.1074_M116.736173_jbc.M116.736173-1.pdf]

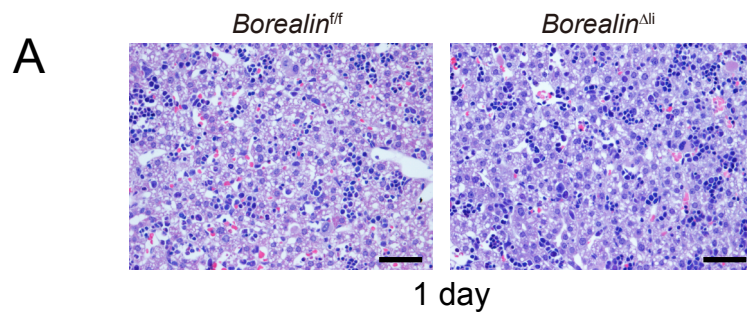

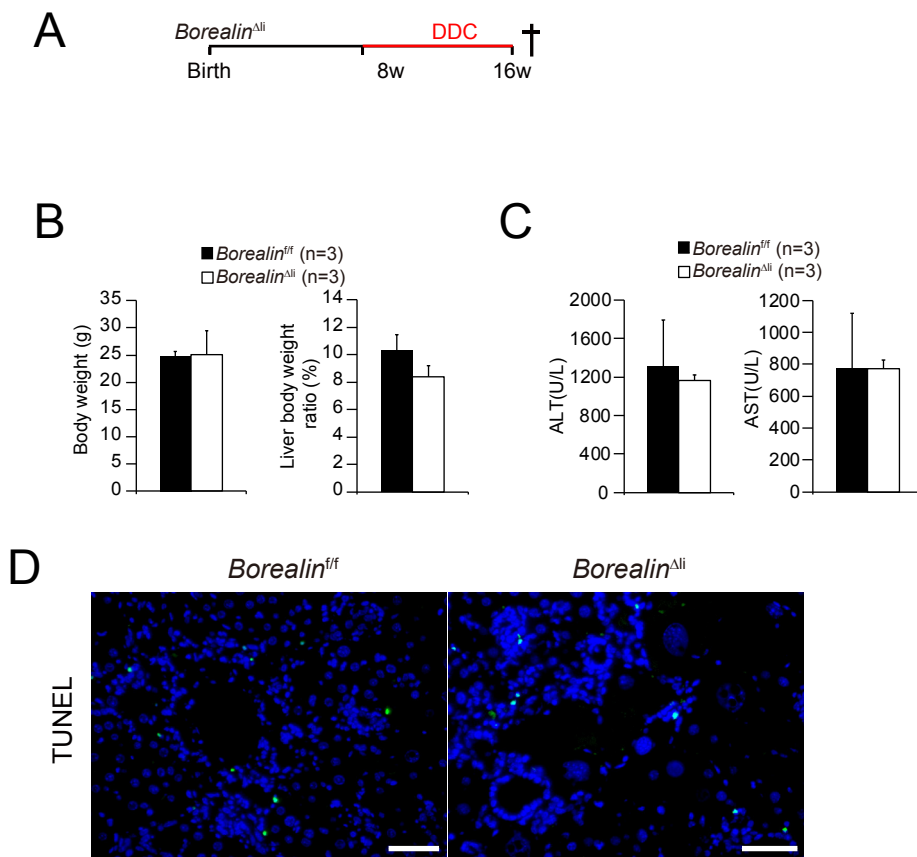

Supplementary Figure 2

## Supplemental Figure Legends

**Figure S1. Hepatocyte morphology were similar between *Borealin*<sup>ff</sup> mice and *Borealin*<sup>Δli</sup> mice at postnatal day 1**

(A) H&E staining of liver sections of 1-day-old *Borealin*<sup>Δli</sup> and control *Borealin*<sup>ff</sup> mice. Scale bars: 50 μm.

**Figure S2. Prolonged DDC treatment did not induce hepatic failure in *Borealin*<sup>Δli</sup> mice**

(A) *Borealin*<sup>Δli</sup> and control *Borealin*<sup>ff</sup> mice were fed with DDC diet for 8 weeks.

(B) Body weights and liver/body weight ratios were measured. (C) Serum ALT and AST levels were measured. (D) TUNEL staining showed that apoptosis of hepatocytes was comparable in *Borealin*<sup>Δli</sup> and control *Borealin*<sup>ff</sup> mice. Scale bars: 50 μm.
